# Supplementary material for: Inhibition of epidermal growth factor signaling by the cardiac glycoside ouabain in medulloblastoma
Source: PubMed Central journal article supplement (PMC4302666; doi:10.1002/cam4.314), 2014-07-23

# Supplementary Figure S2

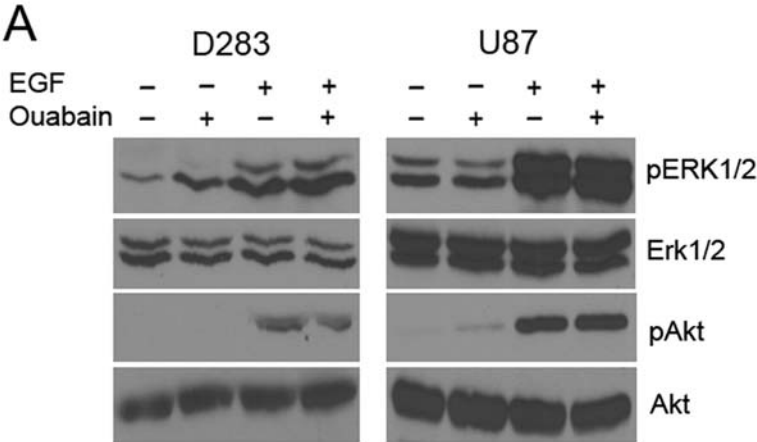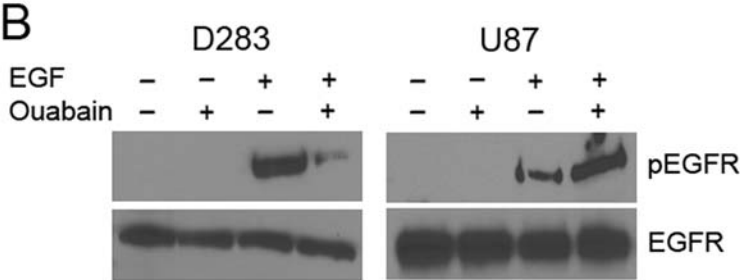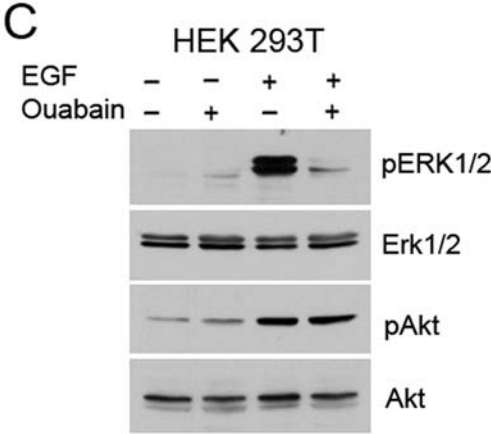

Supplement: cam40003-1146-SD2.pdf [file cam40003-1146-SD2.pdf]
